# Supplementary material for: Luminescence of Cypridina Luciferin in the Presence of Human Plasma Alpha 1-Acid Glycoprotein
Source: MDPI journal article supplement (doi:10.3390/ijms21207516), 2020-10-12
Supplement: s1 [file s1]

## Supplementary Material

# Luminescence of *Cypridina* Luciferin in the Presence of Human Plasma Alpha 1-Acid Glycoprotein

Shusei Kanie \*, Mami Komatsu and Yasuo Mitani \*

Bioproduction Research Institute, National Institute of Advanced Industrial Science and Technology (AIST), Hokkaido Center, Sapporo, 062-8517

\* Correspondence: s-kanie@aist.go.jp (S.K.) and mitani-y.aist.go.jp (Y.M.); Tel.: +81-11-857-8410 (S.K.)

|                    |                                                         |
|--------------------|---------------------------------------------------------|
| BAD08210. 1_CLase1 | MKTLILAVALVYCATVHCQD-CPYEPDPPN---TVPTSCEAKEGECIDSS 46   |
| AAA30332. 1_CLase2 | MKIIILSVILAYCVDNQCQACPVAEPPSSTPTVPTSCEAKEGECIDTR 50     |
| CAA26397. 1_hAGP   | -----                                                   |
| BAD08210. 1_CLase1 | CGTCTRDILSDGLCENKPGKTCRMCQYVIECRVEAAGWFRFTFYGKRFQF 96   |
| AAA30332. 1_CLase2 | CATCKRDILSDGLCENKPGKTCRMCQYVIECRVEAAGYFRFTFYGKRNF 100   |
| CAA26397. 1_hAGP   | -----                                                   |
| BAD08210. 1_CLase1 | QEPGTYVLGQGTKGGDWKVSITLENLDGTKGAVLTKRLEVAGDIIDIAQ 146   |
| AAA30332. 1_CLase2 | QEPGKYVLARGTKGGDWSVTLTMENLDGQKGAVLTKTLEVAGDVIDITQ 150   |
| CAA26397. 1_hAGP   | -----                                                   |
| BAD08210. 1_CLase1 | ATENPITVNGGADPIIANPYTIGEVTVAVVEMPGFNITVIEFFKLIVIDI 196  |
| AAA30332. 1_CLase2 | ATADPITVNGGADPVIANPFTIGEVTVAVVEIPGFNITVIEFFKLIVIDI 200  |
| CAA26397. 1_hAGP   | -----MALSWVLTVLSLLPLEAQI 20                             |
|                    | : : **: : : * : *                                       |
| BAD08210. 1_CLase1 | LGGRSVRIAPDTANKGMISGLCGDLKMMEDTFTSDPEQLAIQPKINQEF 246   |
| AAA30332. 1_CLase2 | LGGRSVRIAPDTANKGLISGICGNLEMDADFTTDADQLAIQPNINKEF 250    |
| CAA26397. 1_hAGP   | P--LCANLVPVPITNATLDQITG-KWFIASAFT-----NEEY 55           |
|                    | : : : * . : : : : * : * * : *                           |
| BAD08210. 1_CLase1 | DGCPLYGNPDDVAYCKGLLEPYKDSRNPINFYYYTISCAFAFCMGGER 296    |
| AAA30332. 1_CLase2 | DGCPFYGNPSDIEYCKGLMEPYRAVCRRNINFYYYTISCAFAFCMGGEER 300  |
| CAA26397. 1_hAGP   | N-----KSVQEIQATFEYFTP-----71                            |
|                    | : : : : * : *                                           |
| BAD08210. 1_CLase1 | ASHVLLDYRETCAAPETRGTGCVLSGHTFYDTFDKARYQFGGPCKEILMAA 346 |
| AAA30332. 1_CLase2 | AKHVLFDYVETCAAPETRGTGCVLSGHTFYDTFDKARYQFGGPCKEILMAA 350 |
| CAA26397. 1_hAGP   | -----NKTEDTIFLR-----EYQTRQDQCINYNT 94                   |
|                    | : * . * . * : * : : : :                                 |
| BAD08210. 1_CLase1 | DCFWNTWDVKVSHRNVDSYTEVEKVRIRKQSTVVELIVDGKQILVGG EAV 396 |
| AAA30332. 1_CLase2 | DCYWNTWDVKVSHRDVESYTEVEKVTIRKQSTVVDLIVDGKQVKVGGVDV 400  |
| CAA26397. 1_hAGP   | TYLNVQRENGTISRYVGGQEHFAHLLILRDTKTYMLAFDVNDEKNWGLSV 144  |
|                    | : : . * * . : : : * : : : * . * : : *                   |
| BAD08210. 1_CLase1 | SIPYSSQNTSIYWQGDILTTAILPEALVVKFNFKQLLVHIRDPFDGKT 446    |
| AAA30332. 1_CLase2 | SIPYSSNTSIYWQGDILTTAILPEALVVKFNFKQLLVHIRDPFDGKT 450     |
| CAA26397. 1_hAGP   | YADKPETTKEQLGEFYEALDCLRIPKSDVYTDWKK-----180             |
|                    | : : . . . : : * : : * * : : :                           |
| BAD08210. 1_CLase1 | CGICGNYNQDFSDDSFDAEGACDLTPNPPGCTEEQKPEAERLCNSLFAGQ 496  |
| AAA30332. 1_CLase2 | CGICGNYNQDSTDDFFDAEGACALTPNPPGCTEEQKPEAERLCNNLFD-- 498  |
| CAA26397. 1_hAGP   | -DKCEPLEKQHEKERKQEEGES-----201                          |
|                    | : * : : : : : * :                                       |
| BAD08210. 1_CLase1 | SDLQKCNVCHKPDPRVERCMYCYCLRGQQGFCDAWEFKKECYIKHGDTL 546   |
| AAA30332. 1_CLase2 | SSIDEKCNVCKPDRIARCMYCYCLRGQQGFCDAWEFKKECYIKHGDTL 548    |
| CAA26397. 1_hAGP   | -----                                                   |
| BAD08210. 1_CLase1 | EVPDECK 553                                             |
| AAA30332. 1_CLase2 | EVPPECQ 555                                             |
| CAA26397. 1_hAGP   | -----                                                   |

**Figure S1.** Overall alignment of hAGP with Clases. CLase1 and CLase2 indicate CLase from *C. noctiluca* and CLase from *V. hilgendorffii*, respectively. Gaps are represented as dashes (-). Numbers in parentheses indicate the positions of last amino acid residues. Gray-shaded characters indicate amino acids involved in the drug-binding ability of hAGP [34]. An asterisk (\*) indicate identical amino acid residues. A colon (:) indicate sites belonging to group exhibiting strong similarity. A period (.) indicate sites belonging to a group exhibiting weak similarity. The site similarity followed the criteria of ClustalW [51].
